# Supplementary material for: 16S rRNA of Mucosal Colon Microbiome and CCL2 Circulating Levels Are Potential Biomarkers in Colorectal Cancer
Source: MDPI journal article supplement (doi:10.3390/ijms221910747), 2021-10-04
Supplement: s1 [file s1]

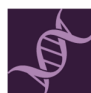

**Supplementary Table S1.** General characteristics of both the enrolled healthy control subjects (n=20, on the left) and of the CRC patients (n= 20, on the right).

| Sample ID   | Age (years) | Gender | BMI (Kg/m <sup>2</sup> ) | Sample ID | Age (years) | Gender | BMI (Kg/m <sup>2</sup> ) | Tumor location   | Tumor Stage* |
|-------------|-------------|--------|--------------------------|-----------|-------------|--------|--------------------------|------------------|--------------|
| HC_OW/OB_01 | 70          | F      | 29                       | CRC_01    | 79          | F      | 29.4                     | Sigma            | I            |
| HC_OW/OB_02 | 67          | F      | 37.4                     | CRC_02    | 91          | F      | 25.78                    | Rectum           | IIIC         |
| HC_03       | 47          | M      | 22.5                     | CRC_03    | 81          | F      | 24.9                     | Rectum           | IIA          |
| HC_04       | 40          | M      | 24.7                     | CRC_04    | 63          | F      | 29.55                    | Descending colon | IIA          |
| HC_OW/OB_05 | 87          | M      | 25.5                     | CRC_05    | 64          | M      | 23.88                    | Rectum           | IIA          |
| HC_OW/OB_06 | 60          | F      | 25.4                     | CRC_06    | 69          | M      | 24                       | Rectum           | I            |
| HC_OW/OB_07 | 50          | F      | 27.2                     | CRC_07    | 47          | M      | 26.42                    | Rectum           | IIIA         |
| HC_OW/OB_08 | 75          | M      | 28.7                     | CRC_08    | 69          | M      | 28.04                    | Sigma            | IIIB         |
| HC_OW/OB_09 | 59          | M      | 28.1                     | CRC_09    | 77          | F      | 24                       | Sigma            | IIA          |
| HC_OW/OB_10 | 69          | F      | 26.7                     | CRC_10    | 79          | M      | 29.01                    | Ascending colon  | IIIB         |
| HC_11       | 34          | F      | 20.6                     | CRC_11    | 39          | F      | 26.04                    | Rectum           | I            |
| HC_12       | 35          | F      | 23.5                     | CRC_12    | 63          | F      | 29.4                     | Descending colon | IVA          |
| HC_OW/OB_13 | 56          | M      | 31.7                     | CRC_13    | 58          | F      | 23.43                    | Sigma            | I            |
| HC_14       | 73          | M      | 20.3                     | CRC_14    | 74          | F      | 32.5                     | Ascending colon  | IIA          |
| HC_15       | 43          | M      | 21.7                     | CRC_15    | 82          | M      | 30.6                     | Ascending colon  | IIIC         |
| HC_16       | 26          | M      | 21.8                     | CRC_16    | 79          | M      | 28.88                    | Rectum           | IIIB         |
| HC_17       | 36          | F      | 22.2                     | CRC_17    | 83          | M      | 28.9                     | Sigma            | IVA          |
| HC_18       | 39          | F      | 22.1                     | CRC_18    | 70          | M      | 32.8                     | Ascending colon  | IIA          |
| HC_OW/OB_19 | 58          | F      | 27.6                     | CRC_19    | 58          | F      | 30                       | Sigma            | IVA          |
| HC_20       | 40          | M      | 24.7                     | CRC_20    | 64          | M      | 26.56                    | Sigma            | IIA          |

Healthy Control (HC): n= 10 BMI $\geq$ 25 (HC\_OW/OB, mean  $\pm$  sd = 28.7 $\pm$ 3.5 Kg/m<sup>2</sup>) and 10 BMI<25 Kg/m<sup>2</sup> (HC\_NW, mean  $\pm$  sd = 22.4 $\pm$ 1.5 Kg/m<sup>2</sup>); CRC: n=15 BMI $\geq$ 25 (CRC\_OW/OB, mean  $\pm$  sd = 28.9 $\pm$ 2.1 Kg/m<sup>2</sup>) and 5 BMI<25 (HC\_NW, mean  $\pm$  sd = 24.0 $\pm$ 0.5 Kg/m<sup>2</sup>). \*Tumor stage was according to the AJCC Staging System for Colon Cancer, 8<sup>th</sup> ed., 2017.

**Supplementary Table S2.** Differentially abundant species in CRC samples grouped by Tumor location with the associated Log2FC values and adjusted *p*-values.

| Tumor location comparisons |                                    |        |                  |
|----------------------------|------------------------------------|--------|------------------|
|                            | Species                            | Log2FC | adjusted p-value |
| R vs AC                    | <i>Akkermansia muciniphila</i>     | 23.20  | 4.69E-32         |
|                            | <i>Bifidobacterium longum</i>      | 7.03   | 2.25E-05         |
|                            | <i>Bacteroides fragilis</i>        | −4.84  | 2.49E-03         |
|                            | <i>Fusobacterium nucleatum</i>     | −4.38  | 3.45E-02         |
|                            | <i>Actinomyces odontolyticus</i>   | 3.13   | 4.23E-02         |
| R vs S-DC                  | <i>Granulicatella adiacens</i>     | −7.67  | 2.15E-03         |
|                            | <i>Bifidobacterium longum</i>      | 5.33   | 2.15E-03         |
|                            | <i>Peptostreptococcus stomatis</i> | −5.39  | 2.15E-03         |
|                            | <i>Bulleidia moorei</i>            | −4.82  | 2.15E-03         |
|                            | <i>Gemella haemolysans</i>         | −5.04  | 2.75E-03         |
|                            | <i>Parvimonas micra</i>            | −4.59  | 2.75E-03         |
|                            | <i>Actinomyces odontolyticus</i>   | −3.94  | 5.15E-03         |
|                            | <i>Alistipes onderdonkii</i>       | 4.00   | 6.16E-03         |
|                            | <i>Bacteroides uniformis</i>       | 4.62   | 6.16E-03         |
|                            | <i>Bacteroides fragilis</i>        | −4.02  | 6.95E-03         |
|                            | <i>Alistipes putredinis</i>        | 3.81   | 7.00E-03         |
|                            | <i>Streptococcus intermedius</i>   | −4.56  | 8.27E-03         |
|                            | <i>Fusobacterium nucleatum</i>     | −3.69  | 3.94E-02         |
| AC vs S-DC                 | <i>Akkermansia muciniphila</i>     | −24.93 | 5.69E-22         |
|                            | <i>Actinomyces odontolyticus</i>   | −7.08  | 1.82E-04         |
|                            | <i>Alistipes putredinis</i>        | 6.90   | 7.14E-04         |
|                            | <i>Granulicatella adiacens</i>     | −10.23 | 1.10E-03         |
|                            | <i>Bacteroides uniformis</i>       | 6.88   | 3.51E-03         |
|                            | <i>Streptococcus intermedius</i>   | −7.03  | 3.86E-03         |
|                            | <i>Alistipes onderdonkii</i>       | 5.30   | 1.06E-02         |
|                            | <i>Parabacteroides distasonis</i>  | 4.29   | 1.92E-02         |
|                            | <i>Gemella haemolysans</i>         | −4.53  | 4.94E-02         |
|                            | <i>Bacteroides dorei</i>           | 5.33   | 4.94E-02         |

AC, ascending colon; S-DC, sigma-descending colon; R, rectum.

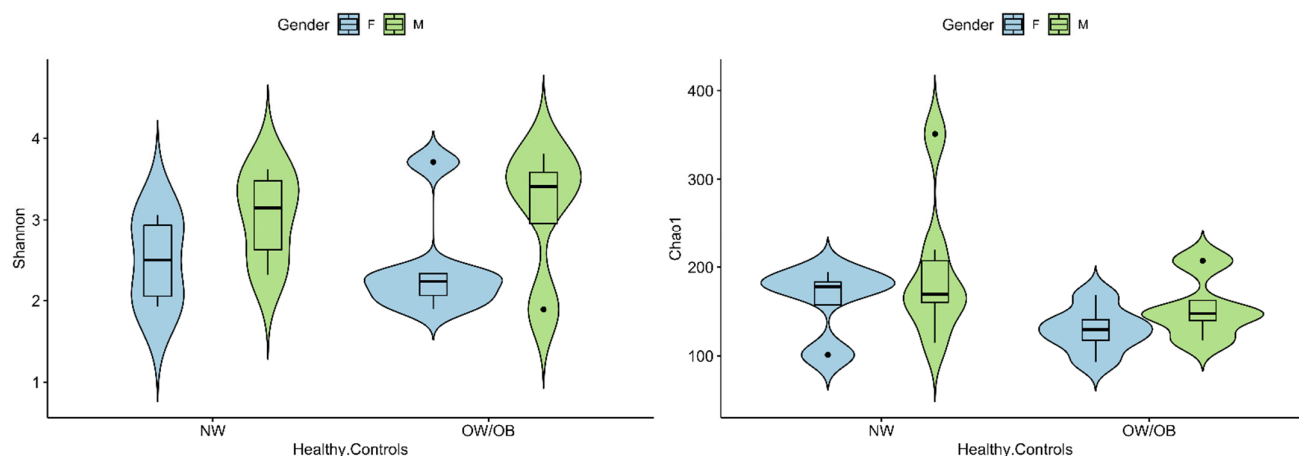

**Supplementary Figure S1.** Violin plot representing alpha diversity measurements. (A) Shannon Diversity Index and (B) Chao1 richness in Healthy Controls NW and OW/OB microbiomes colored by gender. Boxes span the first to third quartiles; the horizontal line inside the boxes represents the median, black dots represent all samples in each group and red dots represent outliers. No statistically significant differences have been detected in both cases.

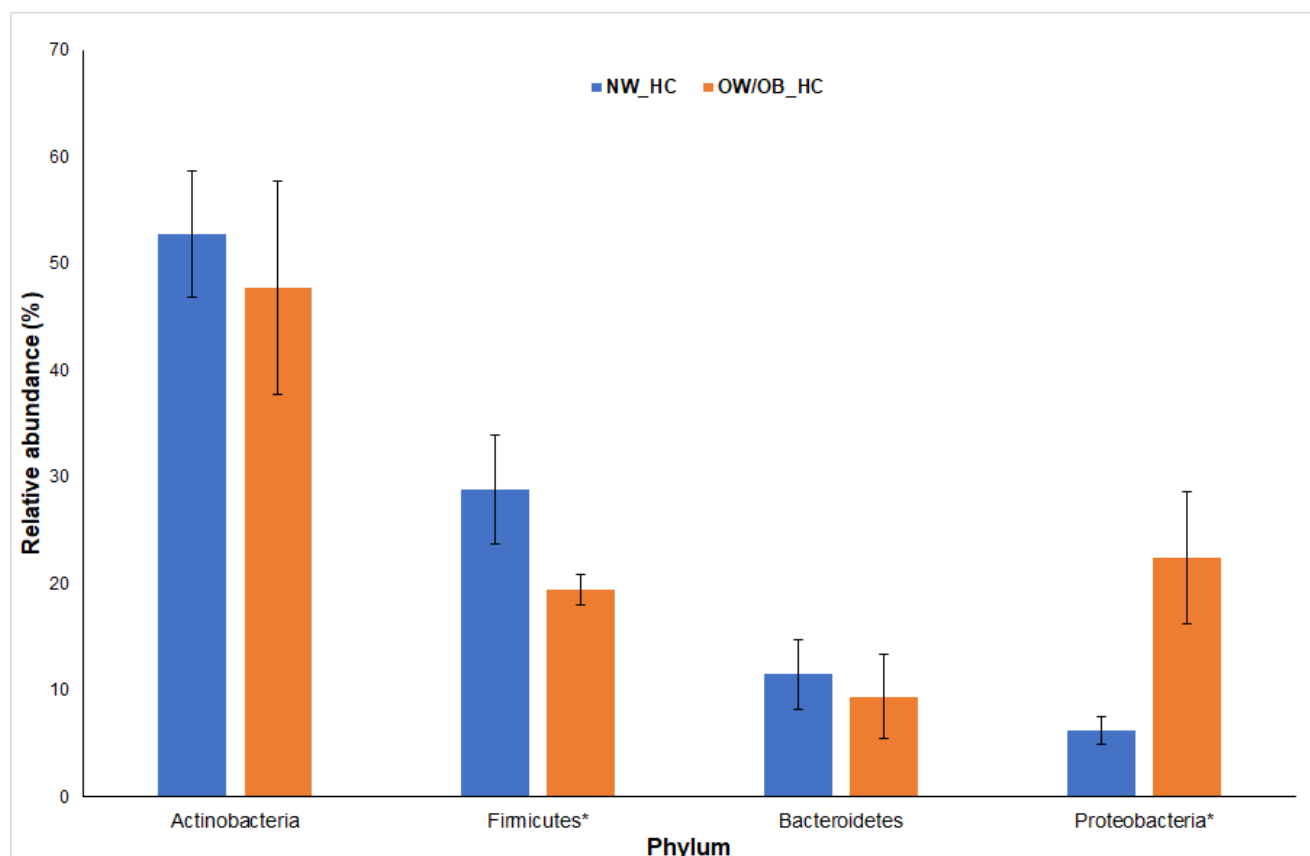

**Supplementary Figure S2.** Bar graph illustrating the mean ± mean standard error (error bars) of the percentage of mean relative abundance (%) of main phyla detected in OW/OB (orange) and NW healthy (blue) groups. \* Statistically different relative abundance between the two groups ( $p < 0.05$ ).

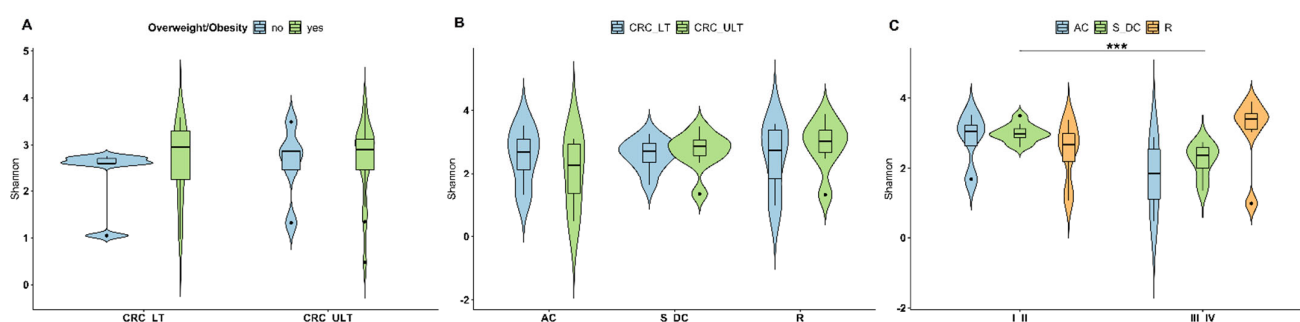

**Supplementary Figure S3.** Violin plot representing alpha diversity measurements in CRC microbiomes. (A) Shannon Diversity Index of CRC\_LT and CRC\_ULT samples colored by overweight/obesity comorbidity; (B) Shannon Diversity Index of samples grouped by the three different tumor location and colored according to CRC\_LT/CRC\_ULT; (C) Shannon Diversity Index of samples grouped by tumor stages and colored according to the tumor location. No statistically significant differences have been detected in all cases, except for the stage comparison in S-DC samples (\*\*\*  $< 0.005$ ). Boxes span

the first to third quartiles; the horizontal line inside the boxes represents the median, black dots represent all samples in each group and red dots represent outliers. LT, tumor lesioned tissue; ULT, unlesioned tissue.

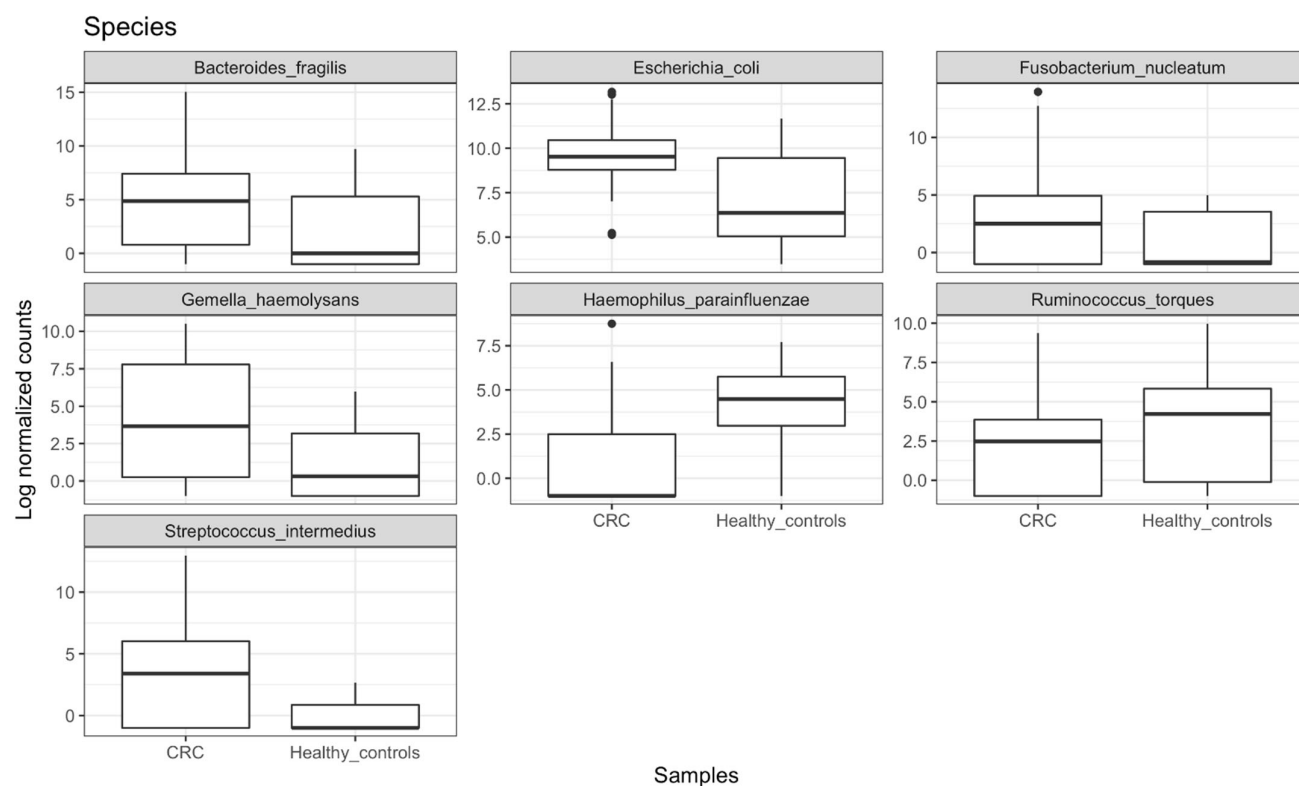

**Supplementary Figure S4.** Boxplots of the significant results (adjusted  $p$ -value  $< 0.05$ ) obtained through differential abundance test between CRC and HC groups at species level. The test has been performed by applying DESeq2 Negative Binomial distribution. Lower and upper box boundaries 25th and 75th percentiles, respectively, line inside box median, lower and upper error lines 10th and 90th percentiles, respectively, filled circles data falling outside 10th and 90th percentiles.

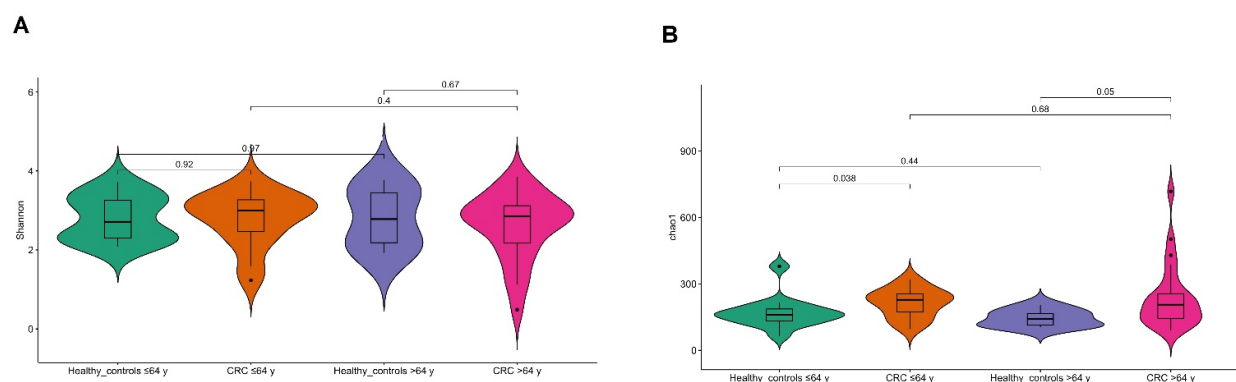

**Supplementary Figure S5.** Violin plot representing alpha diversity measurements. (A) Shannon Diversity Index and (B) Chao1 richness in microbiome of healthy controls and CRC divided in two groups of different age ( $\leq$  or  $>64$  years). Boxes span the first to third quartiles; the horizontal line inside the boxes represents the median, black dots represent outliers.

No statistically significant differences have been detected in both cases, except for Chao1 in the comparison between CRC versus HC in both groups of different age.

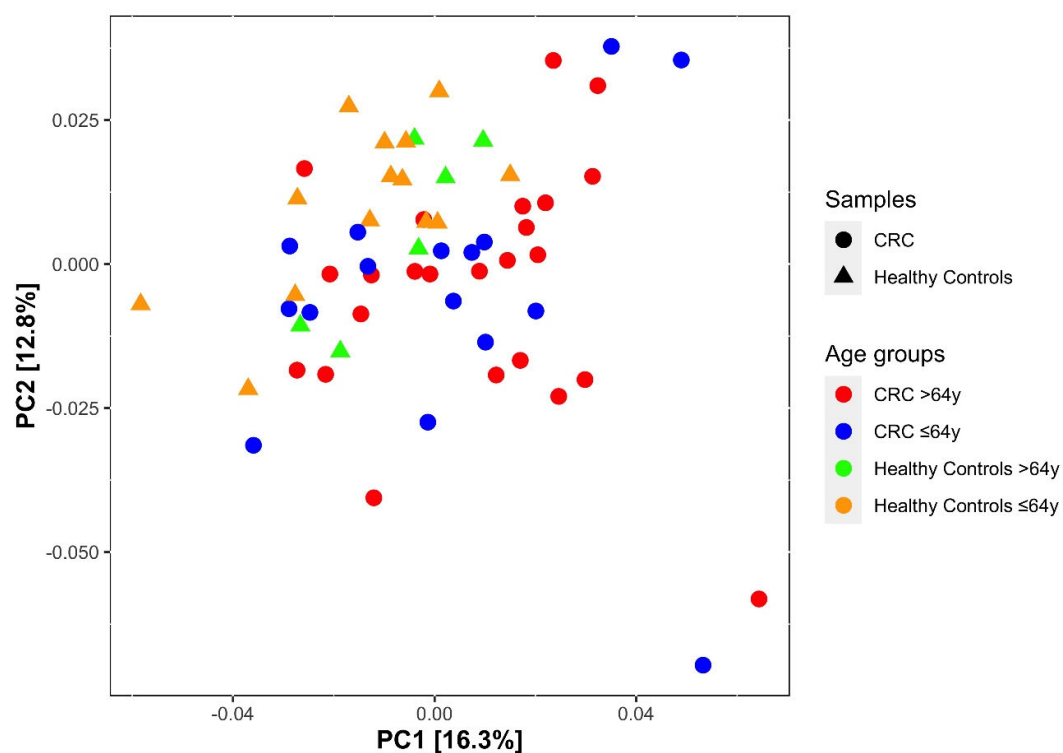

| Groups                     | ADONIS R2 | ADONIS p-value | ANOSIM R | ANOSIM p-value | Beta-disp. F value | Beta-disp. P value |
|----------------------------|-----------|----------------|----------|----------------|--------------------|--------------------|
| CRC/HC<br>(≤ or >64 years) | 0,086     | 0,003          | 0,005    | 0,449          | 1,267              | 0,294              |

**Supplementary Figure S6.** Principal Coordinate Analysis (PCoA) plot of weighted UniFrac distance showing the distribution of CRC patients and healthy controls divided by the age cutoff ( $\leq$  or  $>64$  years). The samples are differently colored according to the age groups and differently shaped according to CRC or healthy (healthy controls) condition. The PERMANOVA (Adonis) test suggests a significant separation of CRC patients and healthy controls considering the age range  $\leq$  or  $>64$  years ( $p = 0.003$ ). Values obtained from Analysis of Similarity (ANOSIM) and beta-dispersion tests are also shown.

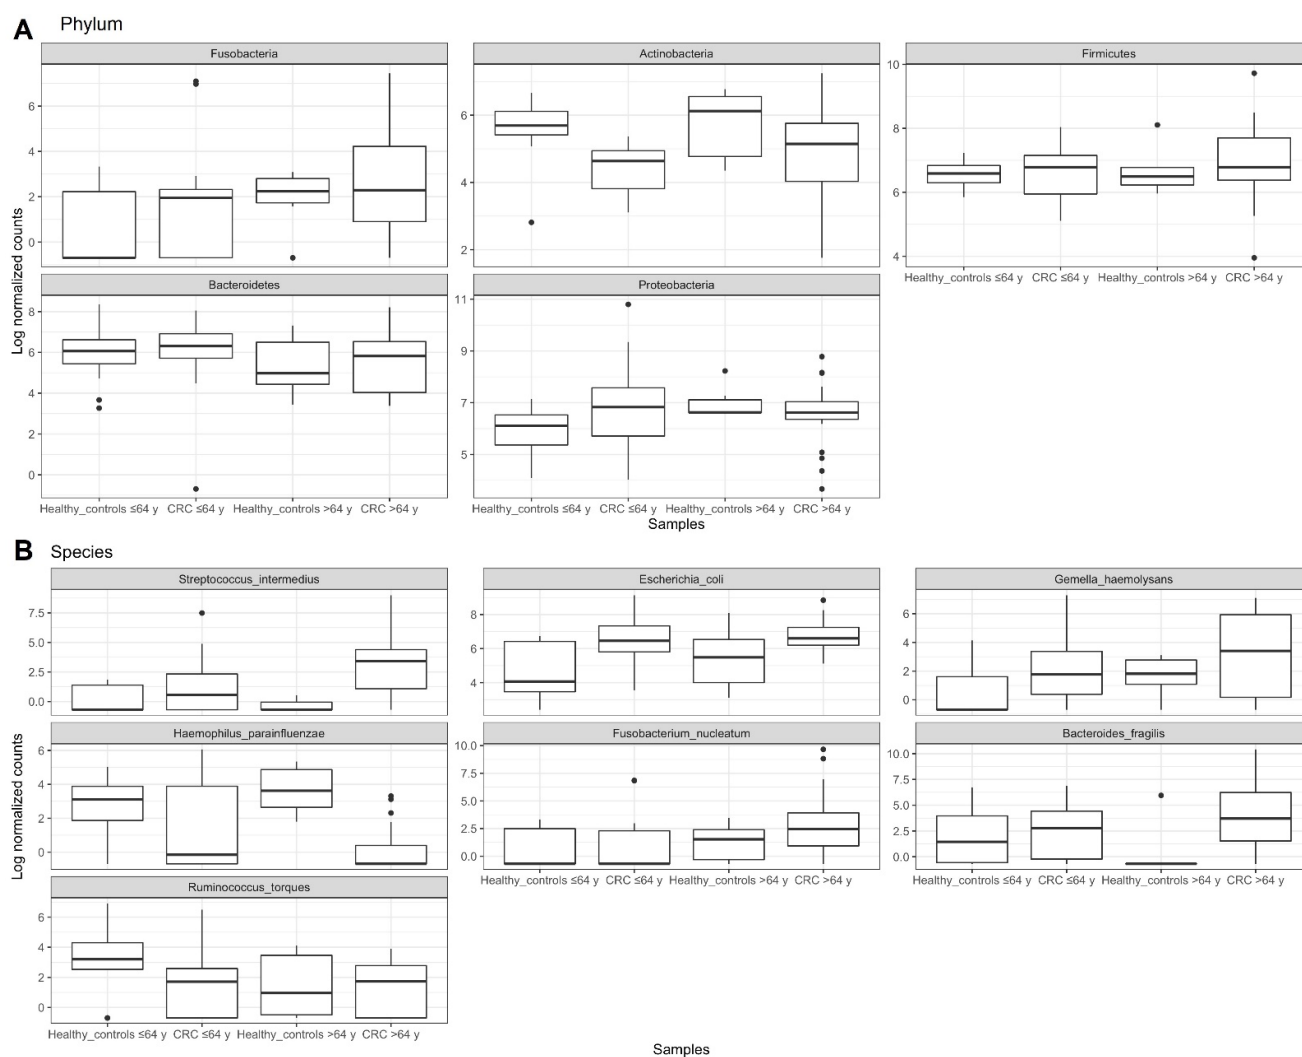

**Supplementary Figure S7.** Boxplots of the microbial abundance (Log normalized counts) in CRC and HC groups  $\leq$  or  $>64$  years at (A) phylum and (B) species levels. The statistical test has been performed by applying DESeq2 Negative Binomial distribution and modeling data by age categorization. The taxa have been grouped by taxonomy level and those having counts  $>1$  in at least 60% of samples have been kept. Lower and upper box boundaries 25th and 75th percentiles, respectively, line inside box median, lower and upper error lines 10th and 90th percentiles, respectively, filled circles data falling outside 10th and 90th percentiles. The taxa were considered statistically significantly different at adjusted  $p$ -value  $< 0.05$ . Actinobacteria and Fusobacteria phyla (adjusted  $p$ -value  $< 0.001$ ) and the species *Streptococcus intermedius*, *Gemella haemolysans*, *Fusobacterium nucleatum*, *Escherichia coli* (adjusted  $p$ -value  $< 0.001$ ) were significantly different between CRC and HC independently from the age differences between the two groups.
